# Supplementary material for: Using mineralogy and higher-level taxonomy as indicators of species sensitivity to pH: A case-study of Puget Sound
Source: Oxford University Press journal article supplement (doi:10.1525/elementa.245), 2017-01-01
Supplement: elementa-5-245-s3.pdf [file elementa-5-245-s3.pdf]

**Table S1: Scoring system used to define relevance of response to decreased ocean pH**

Scoring system used to define the relevance of literature studies to informing sensitivity of Puget Sound species to changes in survival with decreased ocean pH. Modified from Table 1 in Busch and McElhany (2016).

| <b>Rule type</b>                          | <b>Rule set</b>                                                                                                                          | <b>Score</b> |
|-------------------------------------------|------------------------------------------------------------------------------------------------------------------------------------------|--------------|
| Study environment                         | If study took place at a natural CO <sub>2</sub> vent site or takes advantage of a natural gradient in CO <sub>2</sub> conditions        | 1            |
|                                           | If study took place in a laboratory on multiple species living in the same experimental chamber                                          | 0.75         |
|                                           | All else                                                                                                                                 | 0.5          |
| Ability to measure population persistence | If the response has a known relationship to population persistence                                                                       | 1.0          |
|                                           | All else                                                                                                                                 | 0.5          |
| Control pH treatment                      | If pH treatment $\geq 8.1$                                                                                                               | 0.5          |
|                                           | If pH treatment $\geq 7.8, < 8.1$                                                                                                        | 1.0          |
|                                           | If pH treatment $< 7.8$                                                                                                                  | 0.1          |
| Minimum experimental pH treatment         | If pH treatment $> 7.8$                                                                                                                  | 0.5          |
|                                           | If pH treatment $\leq 7.8$                                                                                                               | 1.0          |
| Relatedness to species in Puget Sound     | If species lives in Puget Sound                                                                                                          | 1.0          |
|                                           | If the genus but not species lives in Puget Sound                                                                                        | 0.75         |
|                                           | If the family but not genus lives in Puget Sound                                                                                         | 0.5          |
|                                           | If the order but not family lives in Puget Sound                                                                                         | 0.25         |
|                                           | All else                                                                                                                                 | 0.1          |
| Distribution in the Puget Sound           | If the species occurs in Puget Sound                                                                                                     | 1.0          |
|                                           | If the species occurs in the California Current                                                                                          | 0.75         |
|                                           | If the species does not occur in the California Current                                                                                  | 0.25         |
| Collection location                       | If study subjects were collected in the California Current                                                                               | 1.0          |
|                                           | If study subjects were collected close to the California Current                                                                         | 0.75         |
|                                           | If study subjects were not collected in the California Current or if collection location is unspecified                                  | 0.25         |
| Response type                             | If study evaluates decomposition, genomic response, harmful algal bloom variables, nitrogen fixation, proteomic response, viral shedding | 0.1          |
|                                           | If study evaluates behavior, body composition, immune function, morphology                                                               | 0.2          |
|                                           | If study evaluates acid-base balance, metabolism                                                                                         | 0.5          |
|                                           | If study evaluates calcification                                                                                                         | 0.8          |
|                                           | If study evaluates development, growth, photosynthesis, reproductive rate, survival                                                      | 1.0          |
| Exposure duration                         | If gamete, fertilized egg, spore                                                                                                         | 1.0          |

|                                                                   |      |
|-------------------------------------------------------------------|------|
| If larvae/early life stage of phytoplankton                       |      |
| ≥ 6 hours                                                         | 1.0  |
| < 6 hours                                                         | 0.5  |
| If larvae/early life stage of macroalgae, seagrass                |      |
| ≥ 5 days                                                          | 1.0  |
| < 5 days                                                          | 0.5  |
| If larvae/early life stage of abalone, krill, copepod, polychaete |      |
| ≥ 6 days                                                          | 1.0  |
| < 6 days                                                          | 0.5  |
| If larvae/early life stage of crab                                |      |
| ≥ 30 days                                                         | 1.0  |
| < 30 days                                                         | 0.5  |
| If larvae/early life stage of other invertebrates or vertebrates  |      |
| ≥ 14 days                                                         | 1.0  |
| < 14 days, ≥ 7 days                                               | 0.66 |
| < 7 days                                                          | 0.33 |
| If juvenile stage of macroalgae or seagrass                       |      |
| ≥ 30 days                                                         | 1.0  |
| < 30 days, ≥ 7 days                                               | 0.66 |
| < 7 days                                                          | 0.33 |
| If juvenile stage of invertebrate                                 |      |
| ≥ 30 days                                                         | 1.0  |
| < 30 days, ≥ 7 days                                               | 0.66 |
| < 7 days                                                          | 0.33 |
| If juvenile stage of vertebrate                                   |      |
| ≥ 90 days                                                         | 1.0  |
| < 90 days                                                         | 0.5  |
| If adult stage of phytoplankton, bacteria, copepod                |      |
| ≥ 5 days                                                          | 1.0  |
| < 5 days                                                          | 0.5  |
| If adult stage of macroalgae, seagrass, invertebrate              |      |
| ≥ 50 days                                                         | 1.0  |
| < 50 days, ≥ 10 days                                              | 0.66 |
| < 10 days                                                         | 0.33 |
| If adult stage of vertebrate                                      |      |
| ≥ 100 days                                                        | 1.0  |
| < 100 days                                                        | 0.5  |
| If duration undefined                                             | 0.33 |
